# Supplementary material for: Inflammasome components ASC and AIM2 modulate the acute phase of biomaterial implant-induced foreign body responses
Source: PubMed Central journal article supplement (PMC4748295; doi:10.1038/srep20635), 2016-02-10

## SUPPLEMENTARY INFORMATION

Inflammasome components ASC and AIM2 modulate the acute phase of biomaterial implant-induced foreign body responses

Susan N. Christo, Kerrilyn R. Diener, Jim Manavis, Michele A. Grimbaldston, Akash Bachhuka, Krasimir Vasilev, and John D. Hayball.

### Supplementary Figure legends

**Supplementary Fig. S1. Gating strategy for immunophenotyping leukocyte populations in the peritoneal exudates of mice receiving i.p PMMA bead injections.** The peritoneal exudate of mice injected with PMMA beads (200  $\mu\text{g}/\text{mouse}$ ) was collected via lavage for the immunophenotyping of leukocyte populations. Cells were gated on a forward and side scatter population to exclude debris, followed by the classification of the following leukocytes: neutrophils ( $\text{CD11b}^+\text{Gr-1}^+$ ), macrophages ( $\text{CD11b}^+\text{F4-80}^+$ ), cDCs ( $\text{CD11b}^+\text{CD11c}^+$ ), B cells ( $\text{B220}^+\text{CD19}^+$ ), NK cells ( $\text{CD3}^-\text{NK1.1}^+$ ), NKT cells ( $\text{CD3}^+\text{NK1.1}^+$ ) and  $\text{CD3}^+$  T cells ( $\text{CD3}^+\text{NK1.1}^-$ ). Images are representative of data from wild-type mice at 24 hrs post-injection.

# Supplementary Figures

## Supplementary Fig. S1.

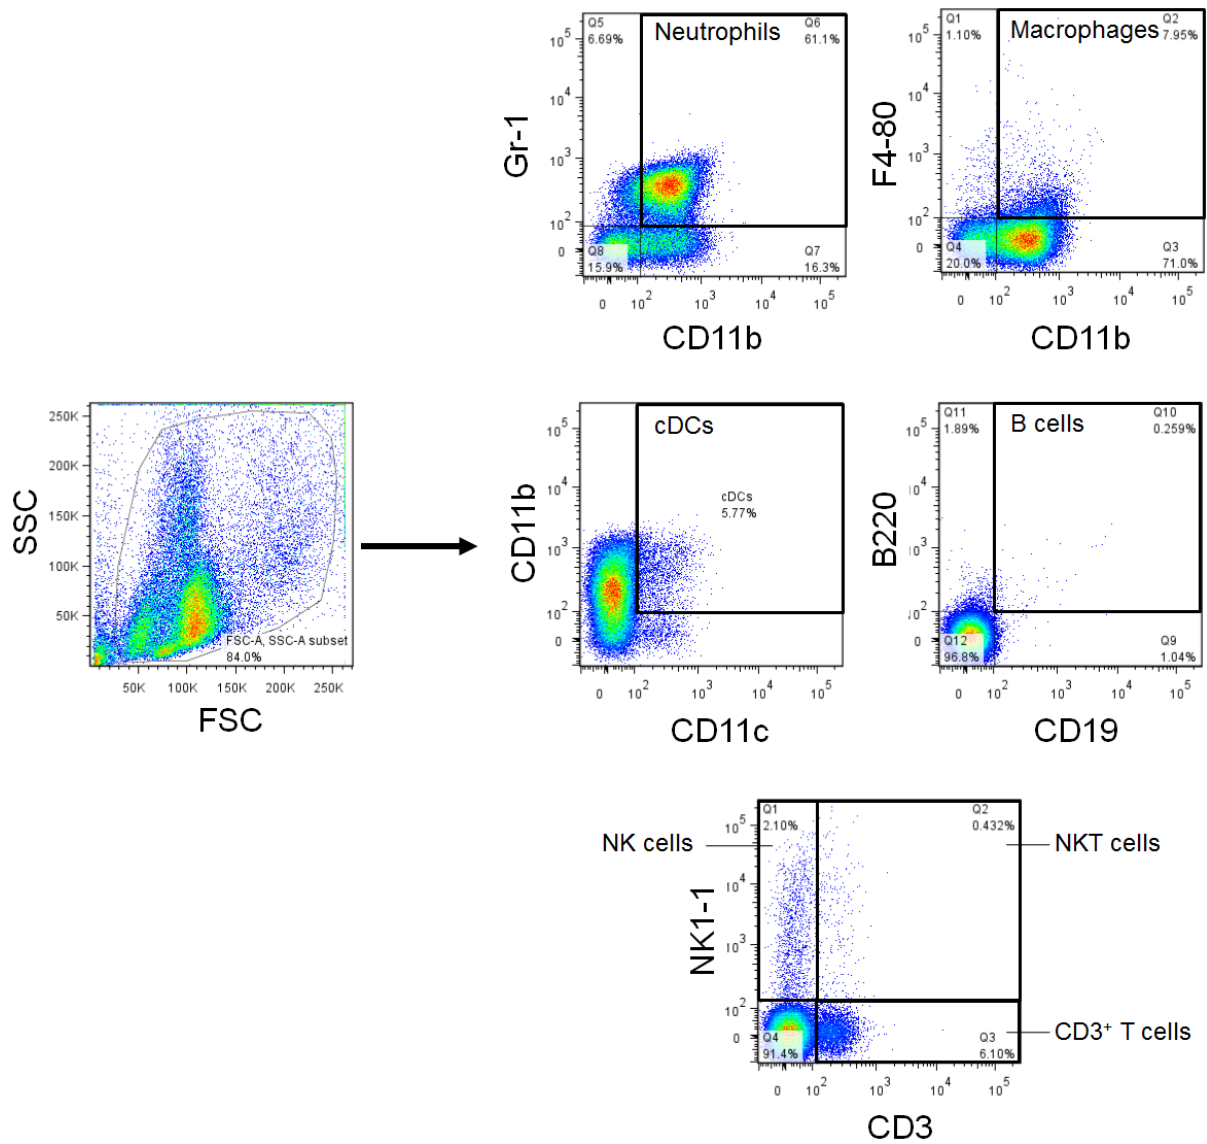

Supplement: srep20635-s1.pdf [file srep20635-s1.pdf]
